# Supplementary material for: Procollagen-lysine, 2-oxoglutarate 5-dioxygenases 1, 2, and 3 are potential prognostic indicators in patients with clear cell renal cell carcinoma
Source: publisher site journal article supplement (doi:10.18632/aging.102206), 2019-08-25
Supplement: Supplementary file [file aging-v11i16-102206-supplementary-material-SD1.pdf]

SUPPLEMENTARY FIGURE

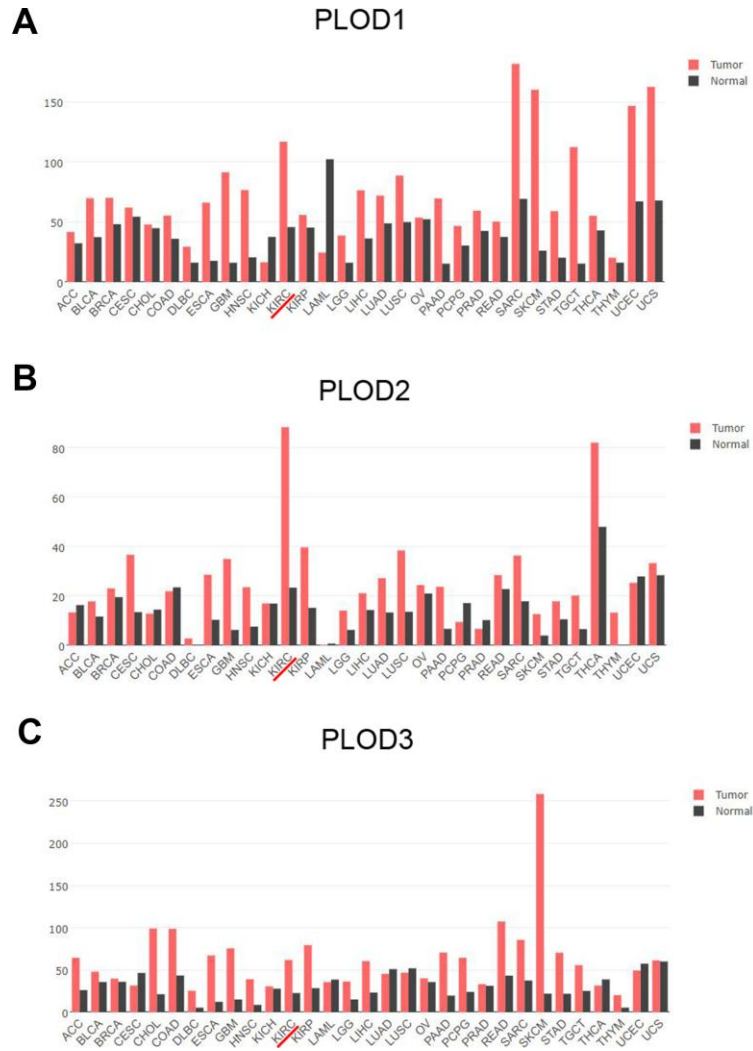

Supplementary Figure 1. PLOD1/2/3 mRNA expression profiles of multi-tumors and corresponding normal tissues.
